# Supplementary material for: A closed-loop and scalable process for the production of biomass-derived superhydrophilic carbon for supercapacitors
Source: Royal Society of Chemistry journal article supplement (doi:10.1039/d1gc00670c), 2021-01-01
Supplement: d1gc00670c1.pdf [file d1gc00670c1.pdf]

## Supporting Information

### **A Closed-loop and Scalable Process for Production of Biomass-derived Superhydrophilic Carbon for Supercapacitors**

Rong Fu<sup>a</sup>, Chang Yu<sup>\*a</sup>, Shaofeng Li<sup>a</sup>, Jinhe Yu<sup>a</sup>, Zhao Wang<sup>a</sup>, Wei Guo<sup>a</sup>, Yuanyang Xie<sup>a</sup>, Le Yang<sup>a</sup>, Kunlun Liu<sup>a</sup>, Weicheng Ren<sup>a</sup> and Jieshan Qiu<sup>\*a,b</sup>

*<sup>a</sup>State Key Lab of Fine Chemicals, School of Chemical Engineering, Liaoning Key Lab for Energy Materials and Chemical Engineering, Dalian University of Technology, Dalian 116024, China*

*<sup>b</sup>College of Chemical Engineering, Beijing University of Chemical Technology, Beijing, China*

*\*Corresponding author: E-mail: chang.yu@dlut.edu.cn (C. Yu) ;  
carbon@dlut.edu.cn (J. S. Qiu)*

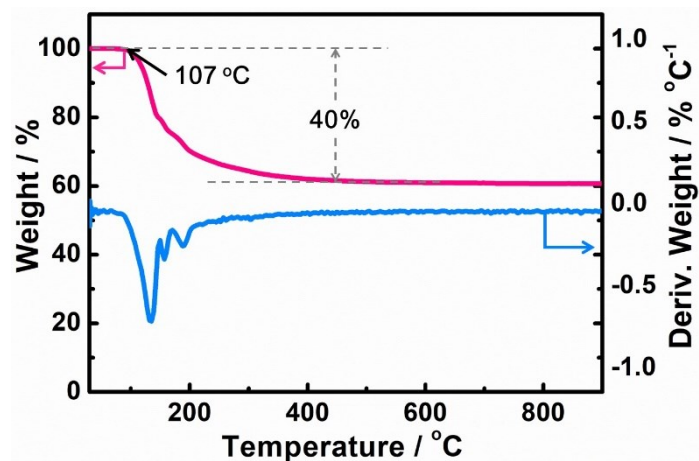

**Fig. S1.** Thermogravimetric analysis (TGA) and differential thermogravimetry (DTG) curves of boric acid in a N<sub>2</sub> atmosphere.

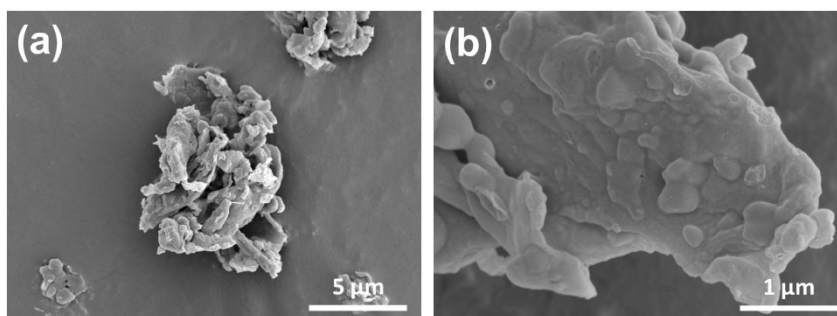

**Fig. S2.** (a, b) SEM images of DFC.

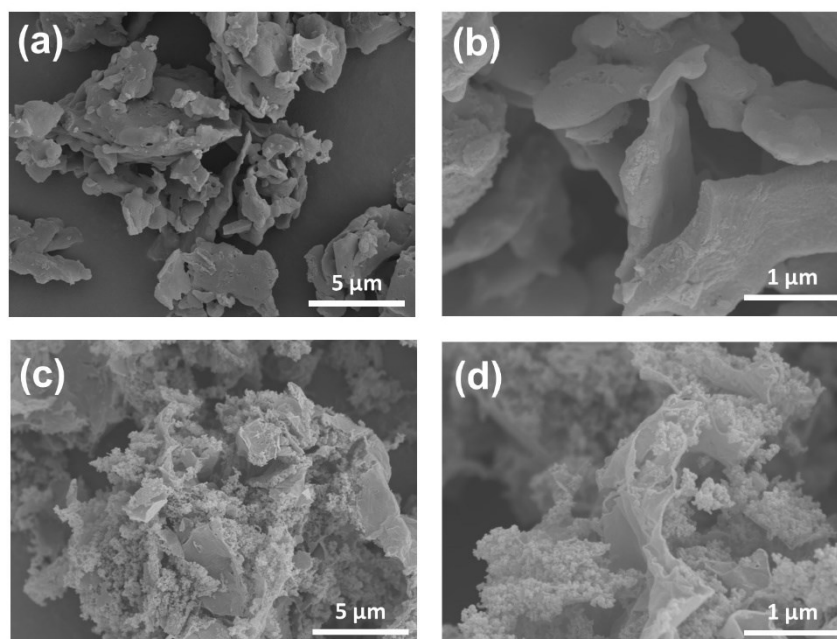

**Fig. S3.** SEM images of (a, b) B<sub>0.5</sub>-SC and (c, d) B<sub>3</sub>-SC.

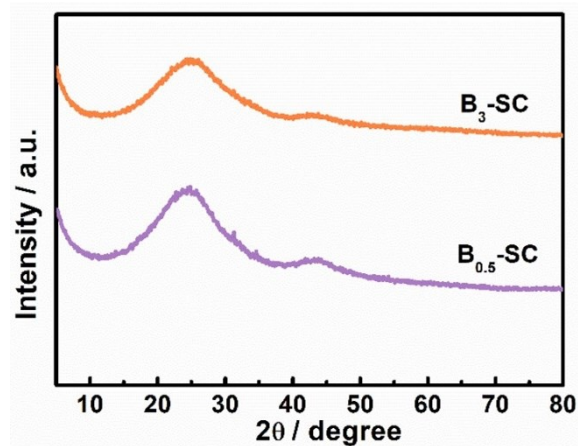

Fig. S4. XRD patterns of  $B_{0.5}$ -SC and  $B_3$ -SC.

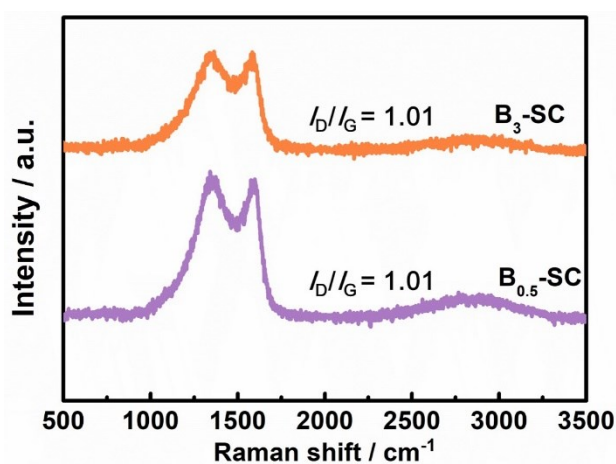

Fig. S5. Raman spectra of  $B_{0.5}$ -SC and  $B_3$ -SC.

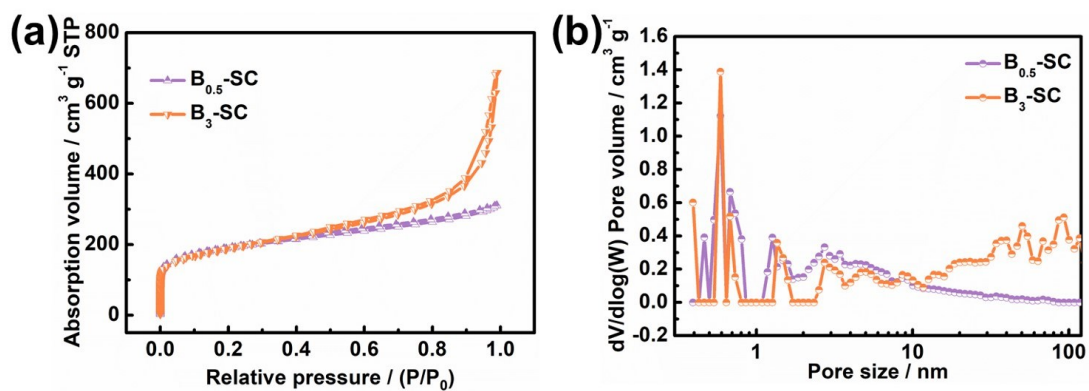

Fig. S6. (a) Nitrogen adsorption-desorption isotherms and (b) pore size distributions of  $B_{0.5}$ -SC and  $B_3$ -SC.

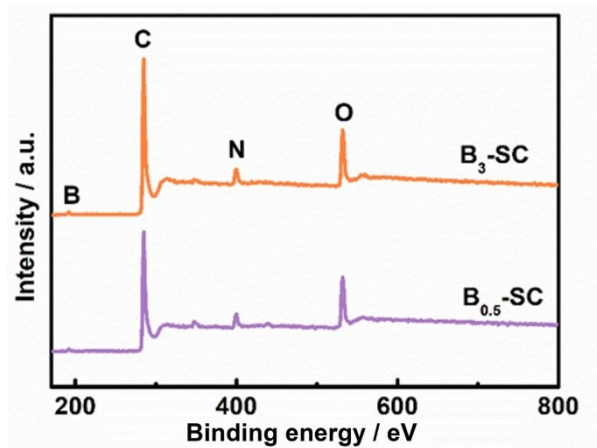

Fig. S7. XPS survey spectra of  $B_{0.5}$ -SC and  $B_3$ -SC.

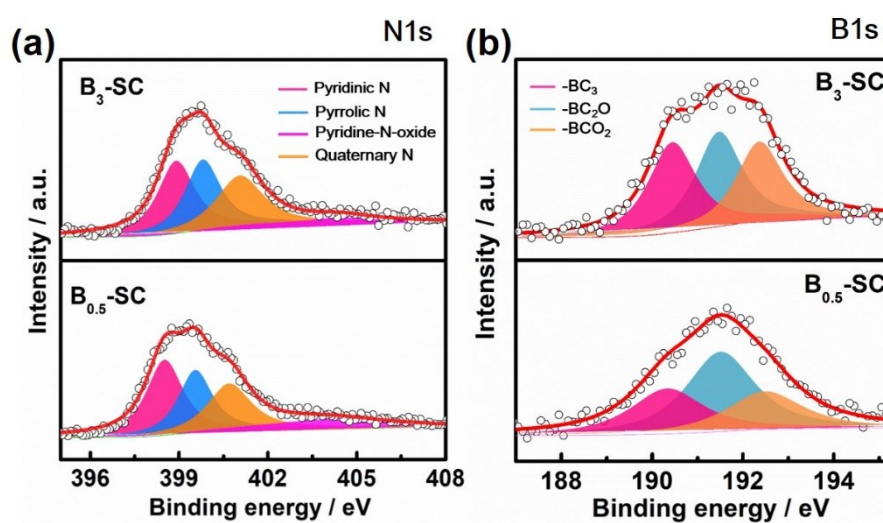

Fig. S8. High-resolution XPS spectra of (a) N 1s and (b) B 1s for  $B_{0.5}$ -SC and  $B_3$ -SC.

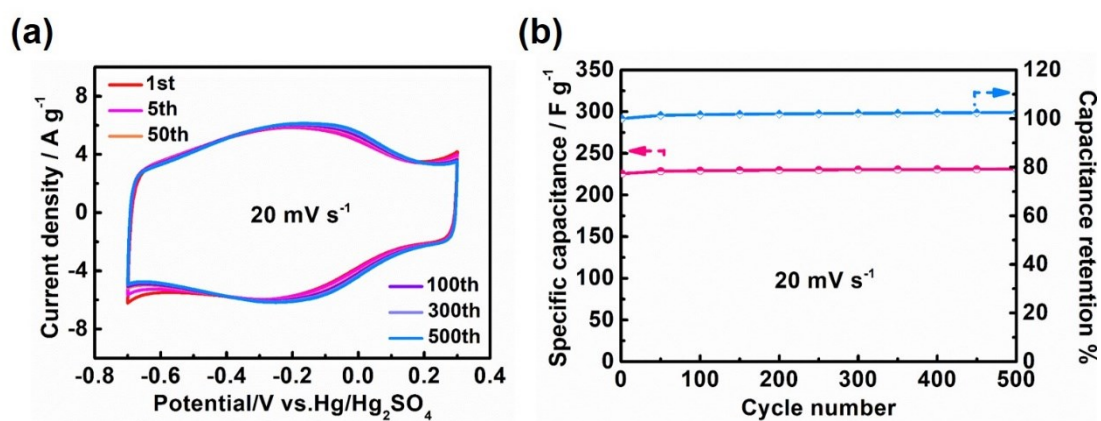

Fig. S9. (a) The CV curves of different cycle numbers and (b) cycling performance for  $B_1$ -SC at  $20 \text{ mV s}^{-1}$ .

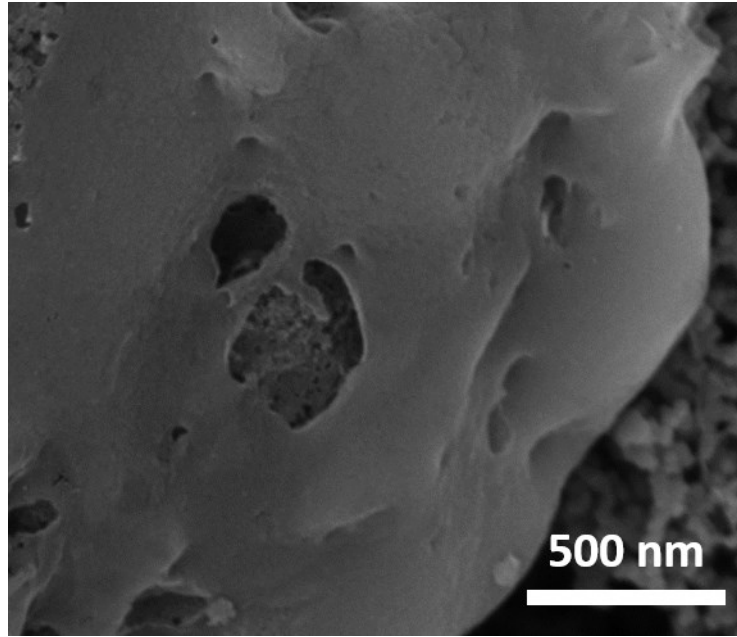

**Fig. S10.** SEM image of B<sub>1</sub>-SC after CV cycling test.

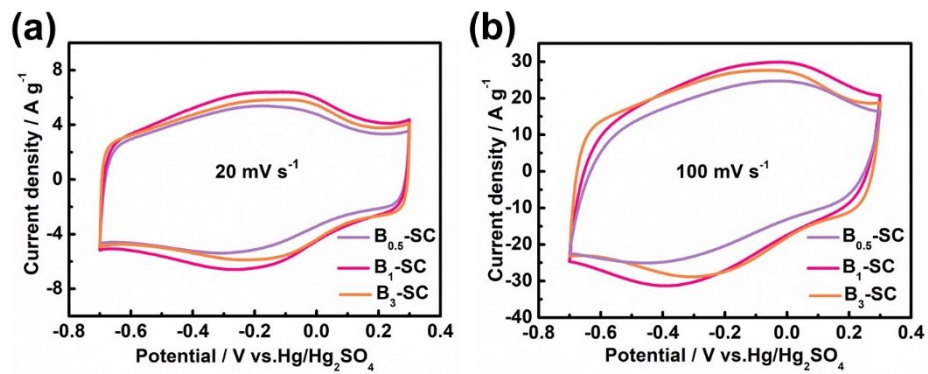

**Fig. S11.** The CV curves for B<sub>0.5</sub>-SC, B<sub>1</sub>-SC and B<sub>3</sub>-SC at scan rates of (a) 20 mV s<sup>-1</sup> and (b) 100 mV s<sup>-1</sup>.

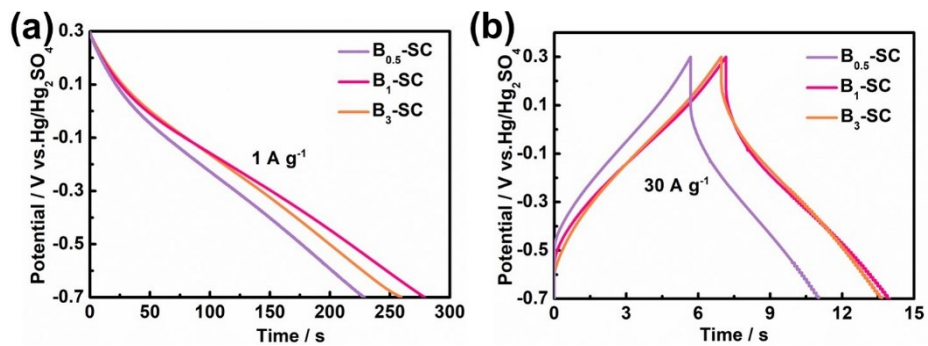

**Fig. S12.** The GC curves for B<sub>0.5</sub>-SC, B<sub>1</sub>-SC and B<sub>3</sub>-SC at current densities of (a) 1 A g<sup>-1</sup> and (b) 30 A g<sup>-1</sup>.

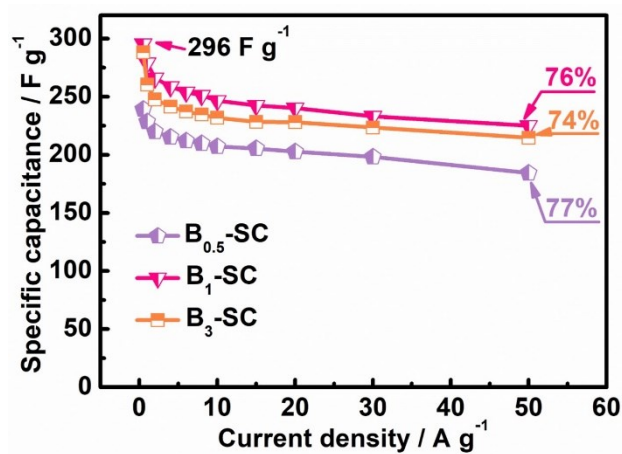

**Fig. S13.** The gravimetric specific capacitances for the B<sub>0.5</sub>-SC, B<sub>1</sub>-SC and B<sub>3</sub>-SC at current densities from 0.5 to 50 A g<sup>-1</sup>.

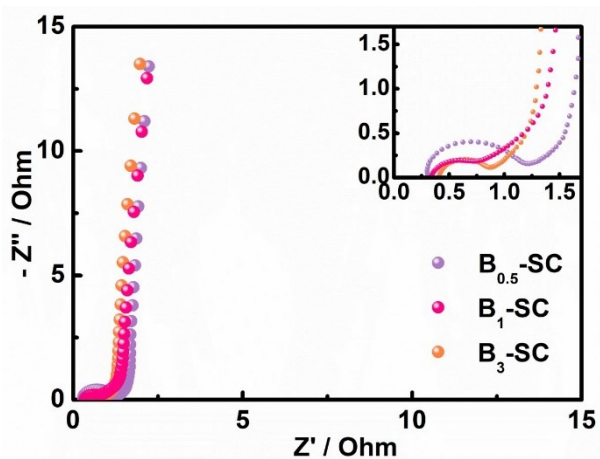

**Fig. S14.** Nyquist plots of the B<sub>0.5</sub>-SC, B<sub>1</sub>-SC and B<sub>3</sub>-SC (inset: a magnification for the high-frequency region).



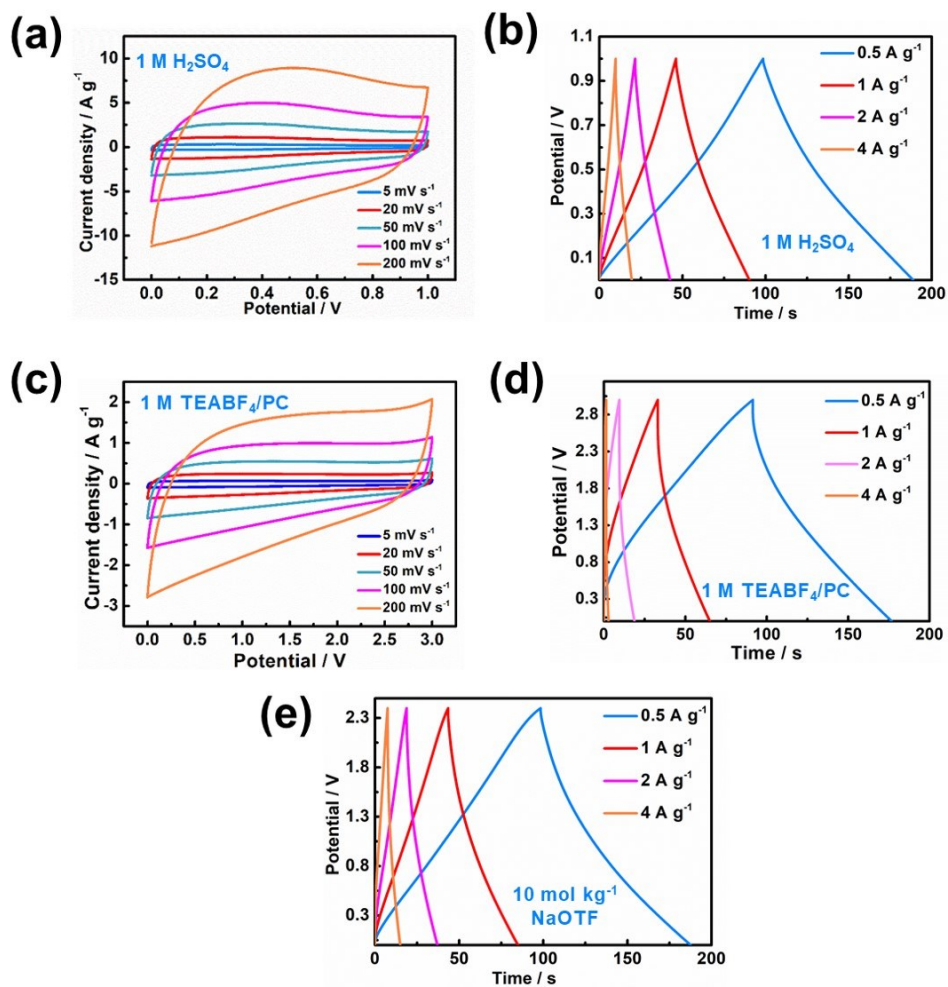

**Fig. S15.** Electrochemical performance of B<sub>1</sub>-SC based symmetric supercapacitors in various electrolytes: CV curves at different scan rates from 5 to 200 mV s<sup>-1</sup> with 1 M H<sub>2</sub>SO<sub>4</sub> (a) and 1 M TEABF<sub>4</sub>/PC (c), respectively; GC curves at various current densities of 0.5-4 A g<sup>-1</sup> with 1 M H<sub>2</sub>SO<sub>4</sub> (b), 1 M TEABF<sub>4</sub>/PC (d) and 10 mol kg<sup>-1</sup> NaOTF (e), respectively.

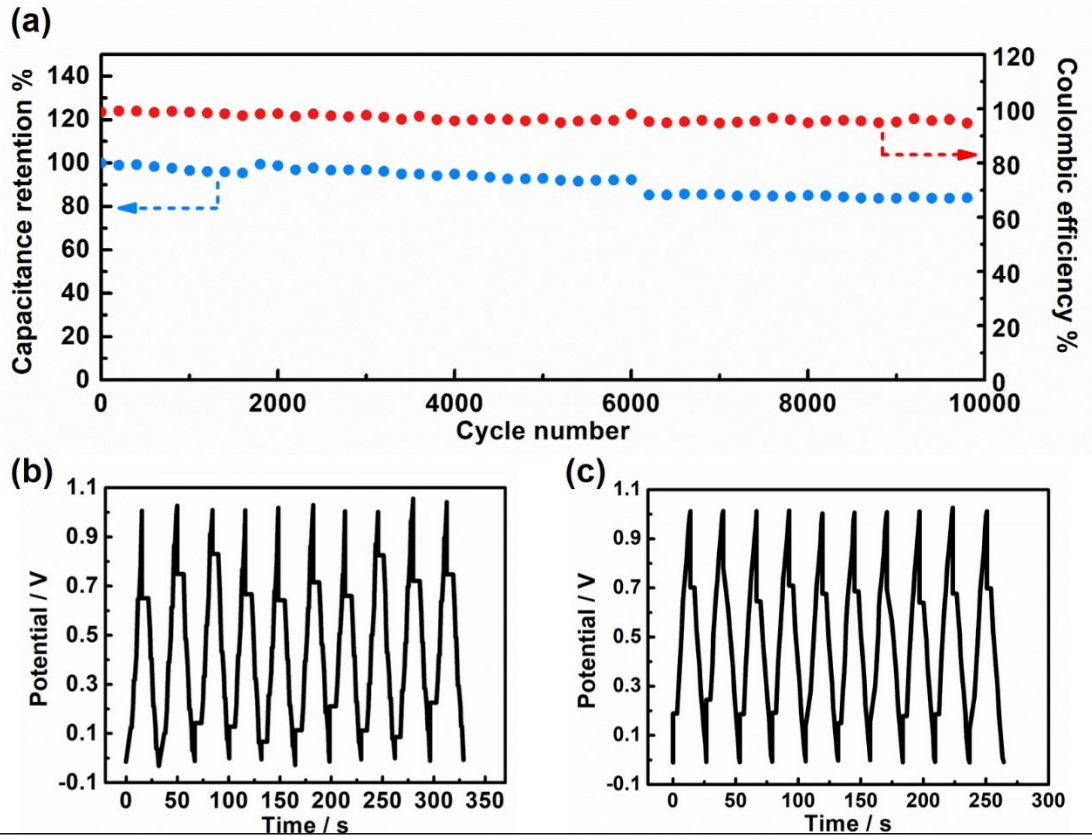

**Fig. S16.** (a) The cycling performance of B<sub>1</sub>-SC for the symmetric supercapacitor with 1 M H<sub>2</sub>SO<sub>4</sub> at 4 A g<sup>-1</sup>. The first ten cycles (b) and last ten cycles (c) of GC curves.

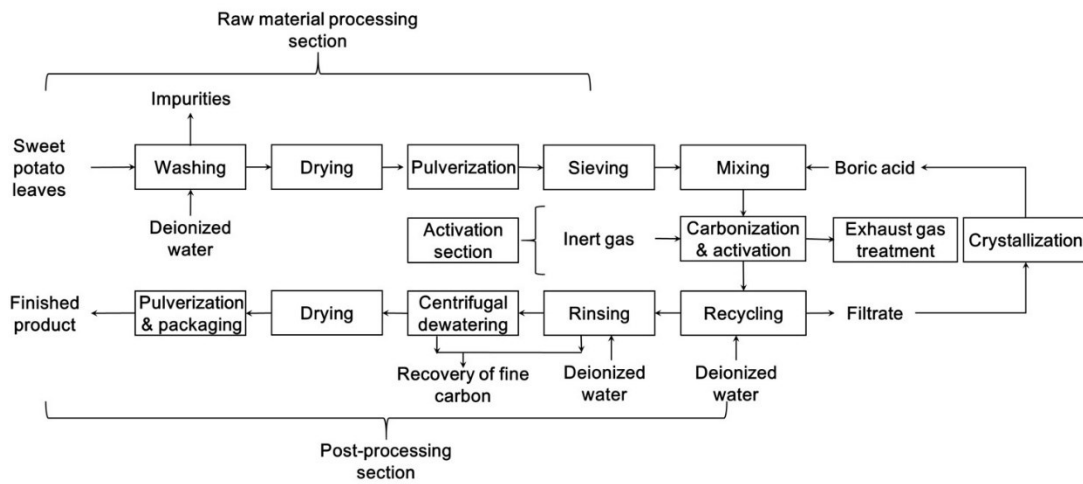

**Fig. S17.** The process flow chart of scalable and green production for B<sub>1</sub>-SC.



(a)

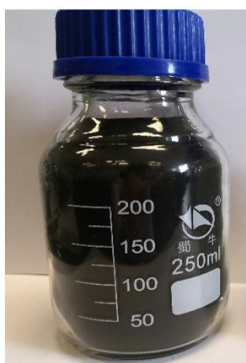

B<sub>1</sub>-SC

(b)

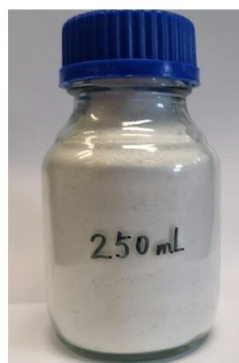

Recycled H<sub>3</sub>BO<sub>3</sub>

**Fig. S18.** The digital photograph of (a) the B<sub>1</sub>-SC black product and (b) recycled boric acid.

**Table S1.** Pore structure parameters of DFC, B<sub>0.5</sub>-SC, B<sub>1</sub>-SC and B<sub>3</sub>-SC measured by N<sub>2</sub> adsorption-desorption isotherms.

| Sample                    | $S_{\text{BET}}^a$<br>(m <sup>2</sup> g <sup>-1</sup> ) | $V_{\text{total}}^b$<br>(cm <sup>3</sup> g <sup>-1</sup> ) | $V_{\text{micro}}^c$<br>(cm <sup>3</sup> g <sup>-1</sup> ) | $V_{\text{meso}}^d$<br>(cm <sup>3</sup> g <sup>-1</sup> ) | $W_d^e$<br>(nm) | $V_{\text{micro}}/V_{\text{total}}^f$<br>% | $V_{\text{meso}}/V_{\text{total}}^g$<br>% | $V_{\text{macro}}/V_{\text{total}}^h$<br>% |
|---------------------------|---------------------------------------------------------|------------------------------------------------------------|------------------------------------------------------------|-----------------------------------------------------------|-----------------|--------------------------------------------|-------------------------------------------|--------------------------------------------|
| <b>DFC</b>                | 1073                                                    | 0.63                                                       | 0.28                                                       | 0.17                                                      | 7.7             | 44                                         | 27                                        | 29                                         |
| <b>B<sub>0.5</sub>-SC</b> | 676                                                     | 0.37                                                       | 0.18                                                       | 0.15                                                      | 4.8             | 49                                         | 41                                        | 10                                         |
| <b>B<sub>1</sub>-SC</b>   | 844                                                     | 0.55                                                       | 0.20                                                       | 0.20                                                      | 6.9             | 36                                         | 36                                        | 28                                         |
| <b>B<sub>3</sub>-SC</b>   | 668                                                     | 0.54                                                       | 0.12                                                       | 0.10                                                      | 11.1            | 22                                         | 19                                        | 59                                         |

<sup>a</sup> Specific surface area calculated by BET method. <sup>b</sup> Total pore volume calculated by DFT method. <sup>c</sup> Micropore volume (DFT, pore size < 2 nm). <sup>d</sup> Mesopore volume (DFT, 2 nm < pore size < 50 nm). <sup>e</sup> Adsorption average pore diameter. <sup>f</sup> Percentage of micropore volume in total pore volume (DFT). <sup>g</sup> Percentage of mesopore volume in total pore volume (DFT). <sup>h</sup> Percentage of macropore volume in total pore volume (DFT).

**Table S2.** Percentages of carbon, oxygen, boron and nitrogen elements in DFC, B<sub>0.5</sub>-SC, B<sub>1</sub>-SC and B<sub>3</sub>-SC derived from XPS analysis (based on the atomic ratio).

| Sample               | C<br>at% | O<br>at% | B<br>at% | N<br>at% |
|----------------------|----------|----------|----------|----------|
| DFC                  | 86.78    | 8.77     | /        | 4.45     |
| B <sub>0.5</sub> -SC | 74.40    | 14.15    | 4.94     | 6.51     |
| B <sub>1</sub> -SC   | 73.46    | 13.88    | 5.94     | 6.72     |
| B <sub>3</sub> -SC   | 77.05    | 12.63    | 4.25     | 6.07     |

**Table S3.** Total N content and the percentages of different N species in DFC, B<sub>0.5</sub>-SC, B<sub>1</sub>-SC and B<sub>3</sub>-SC derived from the XPS analysis.

| Sample               | N <sub>total</sub> <sup>a</sup><br>at% | N-6 <sup>b</sup><br>% | N-5 <sup>c</sup><br>% | N-Q <sup>d</sup><br>% | N-X <sup>e</sup><br>% |
|----------------------|----------------------------------------|-----------------------|-----------------------|-----------------------|-----------------------|
| DFC                  | 4.34                                   | 1.30                  | 1.43                  | 1.17                  | 0.43                  |
| B <sub>0.5</sub> -SC | 6.48                                   | 2.33                  | 1.81                  | 1.68                  | 0.65                  |
| B <sub>1</sub> -SC   | 6.69                                   | 1.34                  | 2.61                  | 2.21                  | 0.54                  |
| B <sub>3</sub> -SC   | 6.05                                   | 2.06                  | 1.94                  | 1.82                  | 0.24                  |

<sup>a</sup> Total N content. <sup>b</sup> Pyridinic N (N-6). <sup>c</sup> Pyrrolic N (N-5). <sup>d</sup> Quaternary N (N-Q). <sup>e</sup> Pyridine-N-oxide (N-X).

**Table S4.** A comparison of reported symmetric carbon based aqueous supercapacitors with our B<sub>1</sub>-SC capacitor.

| Sample                            | Electrolyte                          | Capacitances<br>or<br>Energy<br>density          | Current<br>densities<br>or<br>Power density      | Measuremen<br>t<br>configuration | Ref.         |
|-----------------------------------|--------------------------------------|--------------------------------------------------|--------------------------------------------------|----------------------------------|--------------|
| <b>B<sub>1</sub>-SC</b>           | 1 M H <sub>2</sub> SO <sub>4</sub>   | 181 F g <sup>-1</sup><br>6.0 Wh kg <sup>-1</sup> | 0.5 A g <sup>-1</sup><br>1.0 kW kg <sup>-1</sup> | 2-Electrode                      | This<br>work |
| <b>B/N-carbon<br/>nanosphere</b>  | 1 M H <sub>2</sub> SO <sub>4</sub>   | 60 F g <sup>-1</sup><br>2.1 Wh kg <sup>-1</sup>  | 0.5 A g <sup>-1</sup><br>2.7 kW kg <sup>-1</sup> | 2-Electrode                      | 1            |
| <b>N-doped<br/>porous biochar</b> | 1 M H <sub>2</sub> SO <sub>4</sub>   | 147 F g <sup>-1</sup><br>76 F g <sup>-1</sup>    | 0.05 A g <sup>-1</sup><br>10 A g <sup>-1</sup>   | 2-Electrode                      | 2            |
| <b>HPCSLs</b>                     | 7 M KOH                              | 104 F g <sup>-1</sup><br>3.6 Wh kg <sup>-1</sup> | 20 A g <sup>-1</sup><br>5.7 kW kg <sup>-1</sup>  | 2-Electrode                      | 3            |
| <b>G/CNTs-200</b>                 | 1 M Na <sub>2</sub> SO <sub>4</sub>  | 33 F g <sup>-1</sup><br>8.2 Wh kg <sup>-1</sup>  | 2 mV s <sup>-1</sup><br>0.9 kW kg <sup>-1</sup>  | 2-Electrode                      | 4            |
| <b>BCN</b>                        | 1 M H <sub>2</sub> SO <sub>4</sub>   | 228 F g <sup>-1</sup><br>7.9 Wh kg <sup>-1</sup> | 1 A g <sup>-1</sup><br>0.2 kW kg <sup>-1</sup>   | 2-Electrode                      | 5            |
| <b>BMG-h</b>                      | 1 M H <sub>2</sub> SO <sub>4</sub>   | 122 F g <sup>-1</sup>                            | 1 A g <sup>-1</sup>                              | 2-Electrode                      | 6            |
| <b>B-rGO</b>                      | 1 M H <sub>2</sub> SO <sub>4</sub>   | 240 F g <sup>-1</sup>                            | 0.5 A g <sup>-1</sup>                            | 3-Electrode                      | 7            |
| <b>NPOC</b>                       | 0.5 M H <sub>2</sub> SO <sub>4</sub> | 215 F g <sup>-1</sup><br>123 F g <sup>-1</sup>   | 1 mV s <sup>-1</sup><br>80 A g <sup>-1</sup>     | 3-Electrode                      | 8            |
| <b>LGPCN</b>                      | 6 M KOH                              | 11.7 Wh kg <sup>-1</sup>                         | 0.03 kW kg <sup>-1</sup>                         | 2-Electrode                      | 9            |

**Equation S1.** The possible redox reactions for the N-configurations (1)-(3), O-functional groups (4) and (5) as well as B species (6) in the acidic electrolyte, which refers to the literature<sup>1-9</sup>.

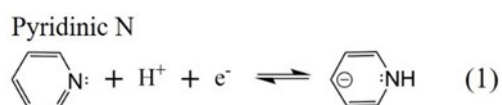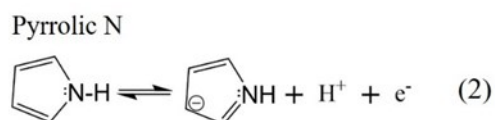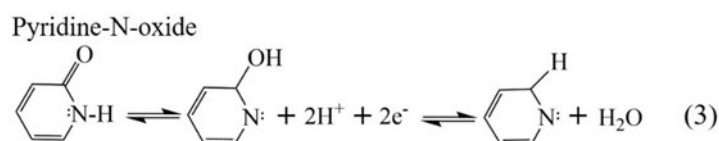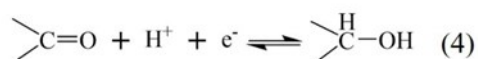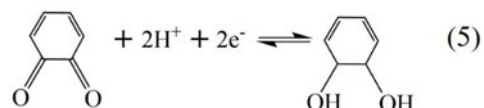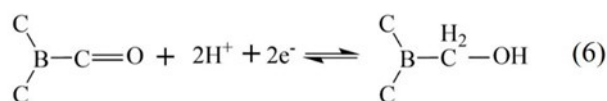

1. J. Hao, J. Wang, S. Qin, D. Liu, Y. Li and W. Lei, *J. Mater. Chem. A*, 2018, **6**, 8053-8058.
2. M. Zhang, C. Yu, Z. Ling, J. Yu, S. Li, C. Zhao, H. Huang and J. Qiu, *Green Chem.*, 2019, **21**, 2095-2103.
3. J. Pang, W. Zhang, J. Zhang, G. Cao, M. Han and Y. Yang, *Green Chem.*, 2017, **19**, 3916-3926.
4. B. Ding, D. Guo, Y. Wang, X. Wu and Z. Fan, *J. Power Sources*, 2018, **398**, 113-119.
5. A. K. Thakur, M. Majumder, R. B. Choudhary and S. B. Singh, *J. Power Sources*, 2018, **402**, 163-173.
6. R. Nankya, J. Lee, D. O. Opar and H. Jung, *Appl. Surf. Sci.*, 2019, **489**, 552-559.
7. T. Zhu, S. Li, B. Ren, L. Zhang, L. Dong and L. Tan, *J. Mater. Sci.*, 2019, **54**, 9632-9642.
8. C. Cui, Y. Gao, J. Li, C. Yang, M. Liu, H. Jin, Z. Xia, L. Dai, Y. Lei, J. Wang and S. Wang, *Angew. Chem. Int. Ed.*, 2020, **59**, 7928-7933.
9. Q. Niu, K. Gao, Q. Tang, L. Wang, L. Han, H. Fang, Y. Zhang, S. Wang and L. Wang, *Carbon*, 2017, **123**, 290-298.
